# Supplementary material for: Phosphoribosylpyrophosphate synthetase as a metabolic valve advances Methylobacterium/Methylorubrum phyllosphere colonization and plant growth
Source: PubMed Central journal article supplement (PMC11252147; doi:10.1038/s41467-024-50342-9), 2024-07-16
Supplement: 41467_2024_50342_MOESM1_ESM.pdf [file 41467_2024_50342_MOESM1_ESM.pdf]

12 **Supplementary Fig. 2**

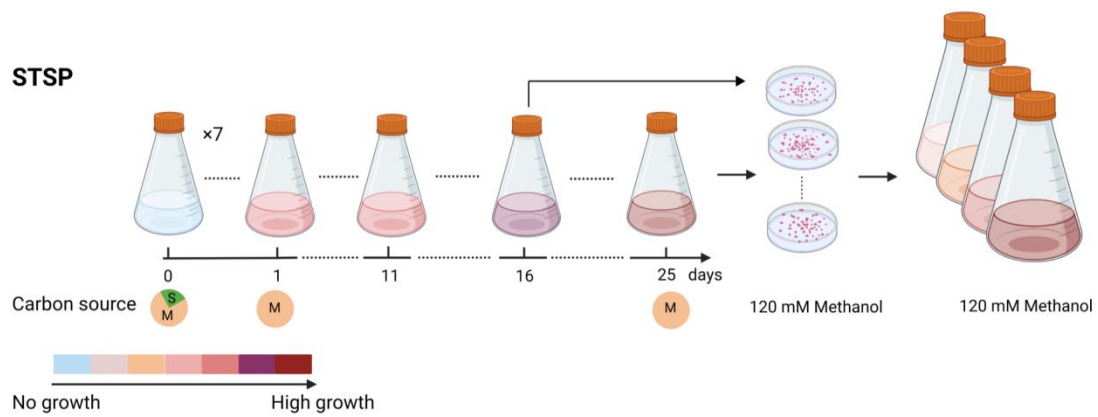

13

14 **Supplementary Fig. 2** Schematic of the strategy of adaptive laboratory evolution to  
15 increase growth fitness of *Mr. extorquens* AM1 at low methanol concentrations. Seven  
16 independent lineages of the RS03 strain were subjected to a STSP evolutionary  
17 experiment. Cultures were incubated in the medium with 100 mM methanol (M) and  
18 5 mM succinate (S) continuously for 25 days, and the OD<sub>600</sub> of cultures was  
19 determined every two days. On the 16th and 25th day, the cultures were diluted and  
20 spread on agar medium with 120 mM methanol. Colonies grown on plates were  
21 transferred into liquid medium with 120 mM methanol to obtain the strains stably  
22 growing on methanol. The isolated strains were further grown on methanol at low  
23 concentrations. The figure was created with Biorender.com.

24

25 **Supplementary Fig. 3**

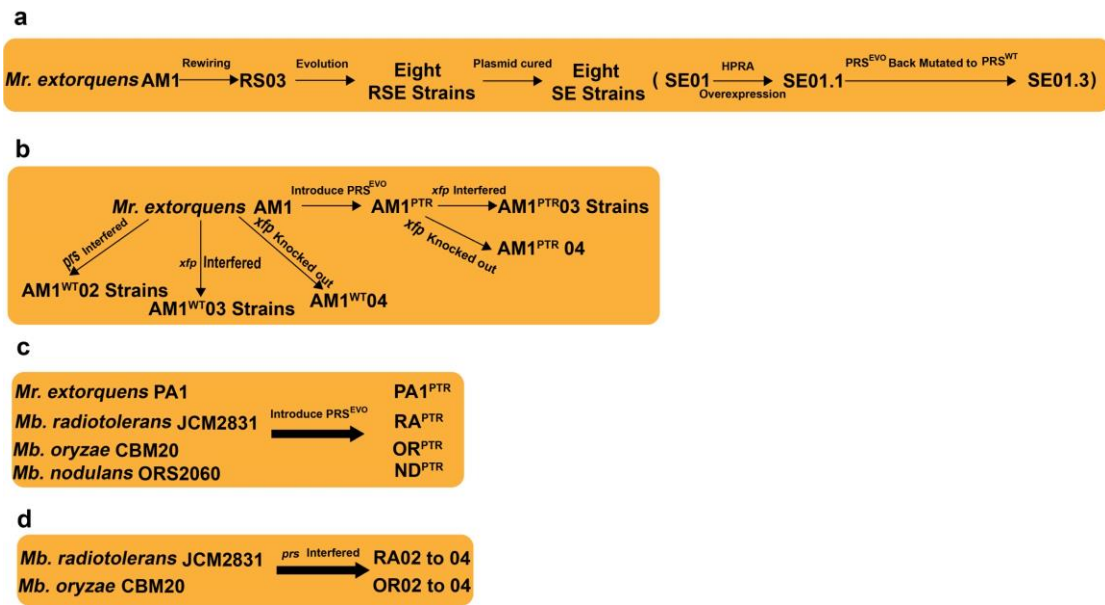

26

27 **Supplementary Fig. 3** Illustration of the strains obtained in this study. (a) Derivatives  
 28 of *Mr. extorquens* AM1 evolutionary strains. (b) *prs*/*xfp* interfered or knocked out  
 29 strains of *Mr. extorquens* AM1 strains. (c) PRS mutated strains of *Mr. extorquens* PA1,  
 30 *Mb. radiotolerans* JCM2831, *Mb. oryzae* CBM20, and *Mb. nodulans* ORS2060. (d)  
 31 *prs* interfered strains of *Mb. radiotolerans* JCM2831 and *Mb. oryzae* CBM20.

32

33 **Supplementary Fig. 4**

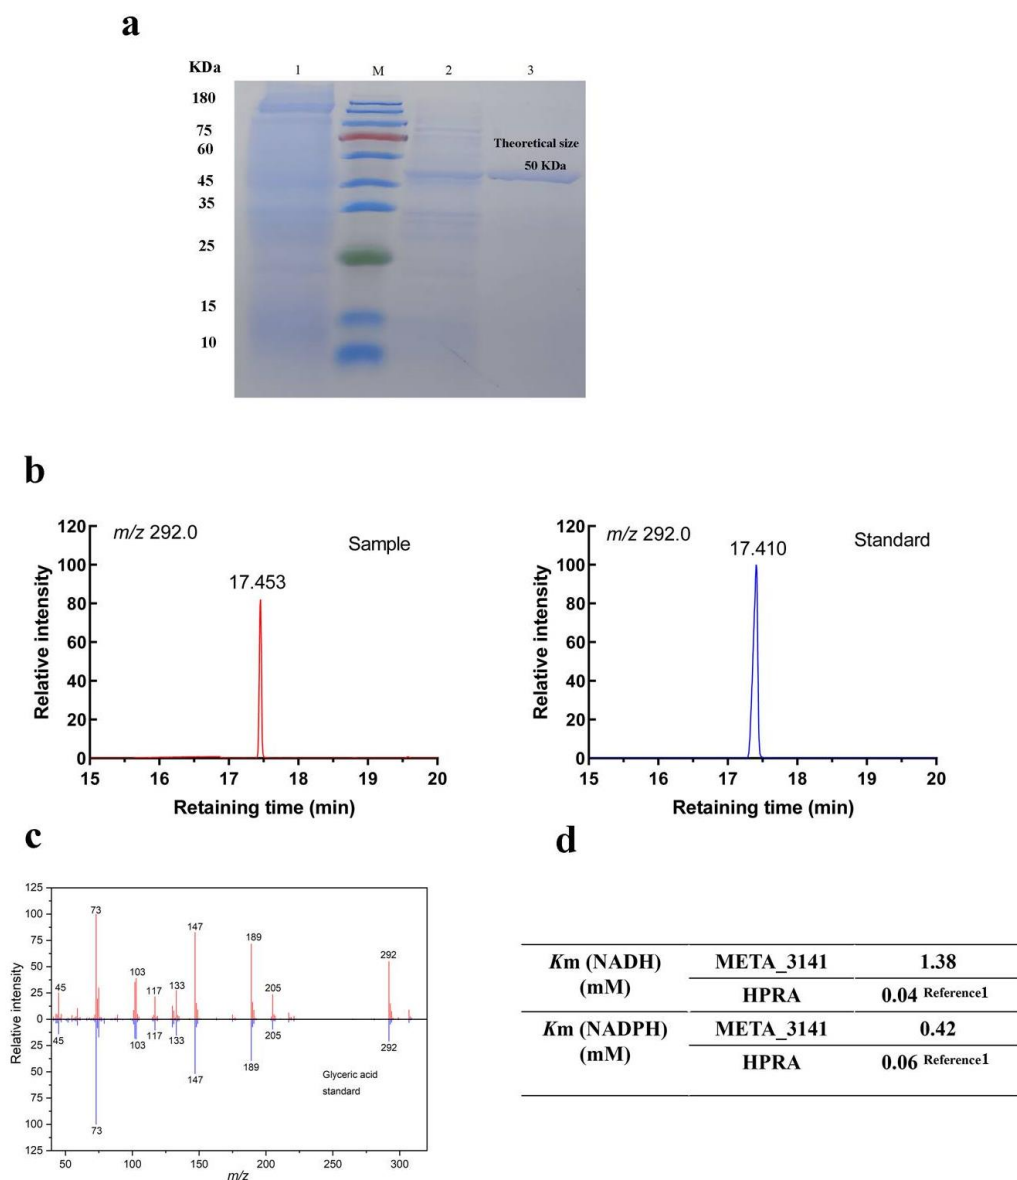

34

35 **Supplementary Fig. 4** Enzymatic assay to analyze the function of the hypothetical  
 36 protein META1\_3141. (a) The purified META1\_3141 protein was detected by  
 37 SDS-PAGE. M: Protein marker; 1: Total soluble protein of *E. coli* with empty plasmid  
 38 pET-32a; 2: Total soluble protein of *E. coli* with recombinant plasmid; 3: Purified  
 39 recombinant META1\_3141. (b) Extracted ion chromatograms of enzymatic sample  
 40 and glycerate standard. (c) Mass spectrometry of the extracted ion of  $m/z$  292.0 from  
 41 the enzymatic sample and the glycerate standard. (d) The  $K_m$  values of measured  
 42 META1\_3141 and reported hydroxypyruvate reductase.

43

44

45 **Supplementary Fig. 5**

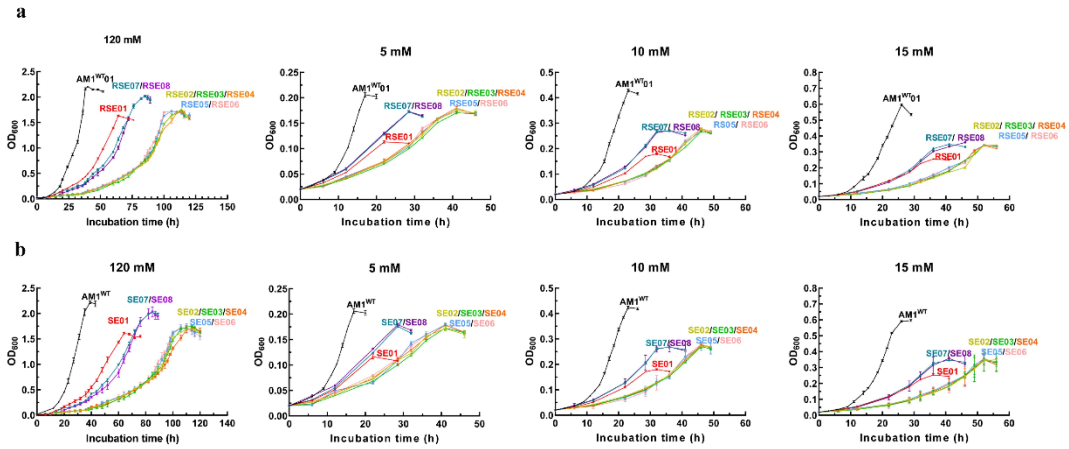

46

47 **Supplementary Fig. 5** The evolved RSE strains and the SE strains (derivatives of the  
48 evolved RSE strains) do not show a growth advantage at low methanol concentrations.  
49 (a) Growth curves of eight evolved RSE strains and the AM1<sup>WT</sup>01 strain (the WT *Mr.*  
50 *extorquens* AM1 with empty plasmid pCM80) on 120 mM methanol, or on low  
51 methanol concentrations of 5 mM, 10 mM, and 15 mM. (b) Growth curves of eight  
52 SE strains and the AM1<sup>WT</sup> strain on 120 mM methanol at, or on low methanol  
53 concentrations of 5 mM, 10 mM, and 15 mM. Data are presented as mean  $\pm$  SD (n=6  
54 biologically independent samples with three technical repeats). Source data are  
55 provided as a Source Data file.

56

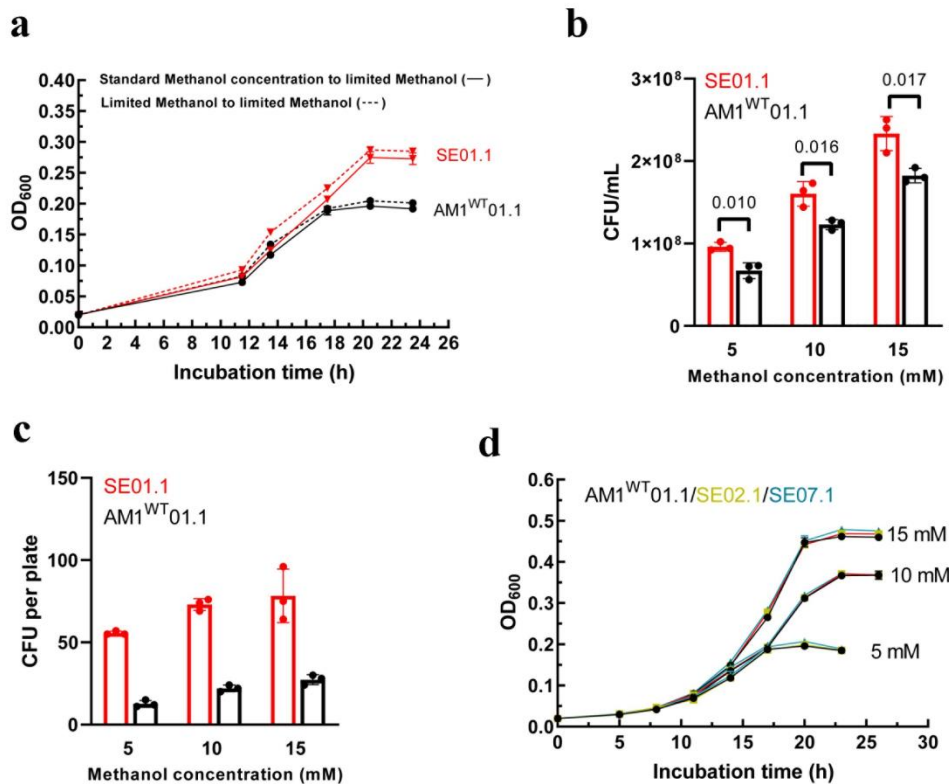

58

59 **Supplementary Fig. 6** The SE01.1 strain shows a growth advantage at low methanol  
 60 concentrations, while the SE02.1 and SE07.1 strains do not improve the growth at low  
 61 methanol concentrations. (a) The growth advantage of the SE01.1 strain transferred  
 62 from limited-to-limited methanol in liquid media (Solid lines, 5 mM to 5 mM) was  
 63 the same as the strain transferred from standard-to-limited methanol (Dotted lines,  
 64 120 mM to 5 mM). (b) Viable cells of SE01.1 and AM1<sup>WT</sup>01.1 (*Mr. extorquens*  
 65 AM1- $\Delta$ *hprA*-pCM80::*hprA*) at the early stationary growth phase grown at low  
 66 methanol concentrations. Both strains were grown to the early stationary phase at  
 67 methanol of 5 mM, 10 mM, and 15 mM, and then spread on the solid agar plate with  
 68 120 mM methanol. Colonies were counted after incubating for seven days. (c) Growth  
 69 advantage of SE01.1 on agar plates with low methanol concentrations. The SE01.1  
 70 and AM1<sup>WT</sup>01.1 strains were grown to the exponential phase at methanol of 5 mM,  
 71 10 mM, and 15 mM, and then were adjusted to the same OD<sub>600</sub> value and spread on  
 72 the plate with 5 mM, 10 mM, and 15 mM methanol. Colonies were counted after  
 73 incubating for three days. (d) The SE02.1 and SE07.1 strains showed the same growth

74 trend as the AM1<sup>WT</sup> 01.1 strain. The SE02.1 and SE07.1 strains were obtained by  
75 curing the plasmid in the RSE02 and RSE07 strain and then overexpressing *hprA* on  
76 pCM80. Data are presented as mean  $\pm$  SD (For a and d, n=6 biologically independent  
77 samples with three technical repeats; for b and c, n=3 biologically independent  
78 samples with three technical repeats). Significance was analyzed using a two-tailed  
79 t-test analysis. Source data are provided as a Source Data file.

80

81

82 **Supplementary Fig. 7**

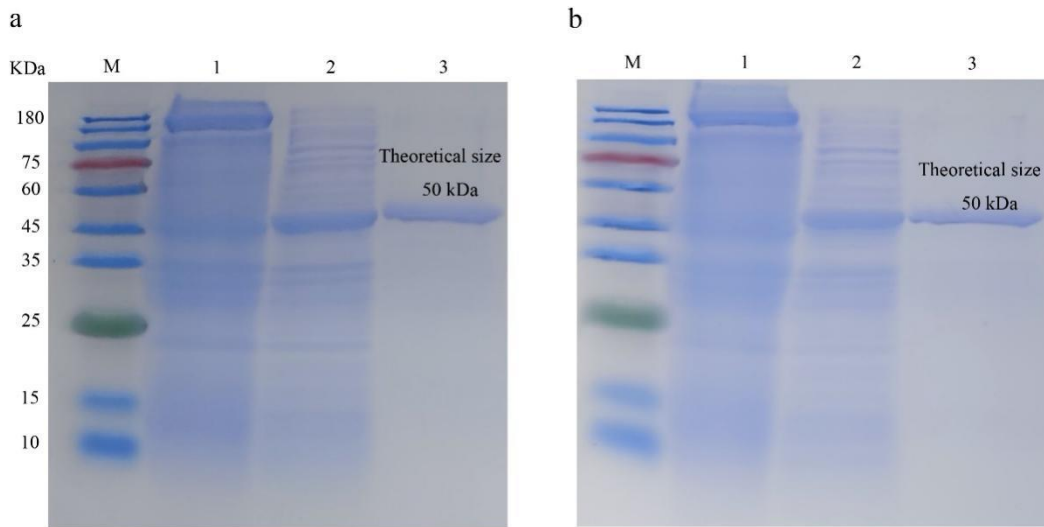

83

84 **Supplementary Fig. 7** Purification of PRS<sup>WT</sup> (a) and PRS<sup>EVO</sup> (b) from *Escherichia*  
85 *coli* BL21 (DE3). M: Protein marker; 1: Total soluble protein of *E. coli* with empty  
86 plasmid pET-32a; 2: Total soluble protein of *E. coli* with recombinant plasmid; 3:  
87 Purified recombinant PRS.

88



89 **Supplementary Fig. 8**

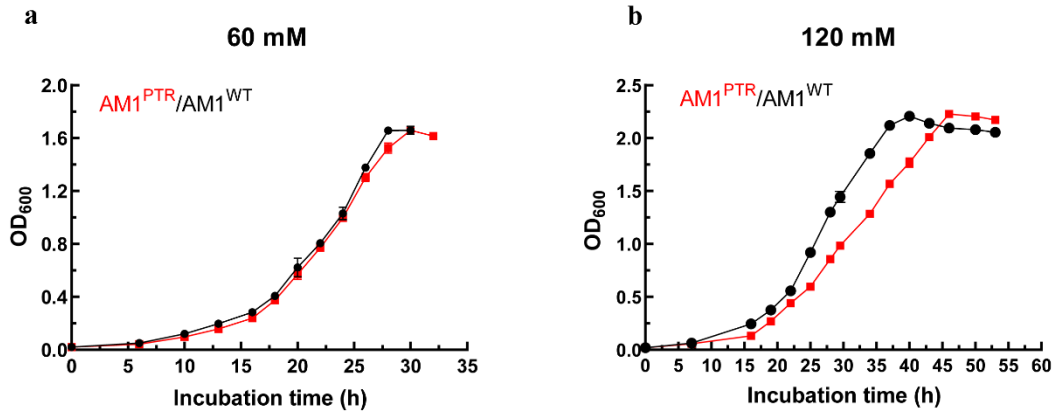

90

91 **Supplementary Fig. 8** The growth fitness of the  $AM1^{PTR}$  strain shows the same trend  
92 as the  $AM1^{WT}$  strain at 60 mM methanol (a), while its growth appeared slower than  
93 the  $AM1^{WT}$  strain at 120 mM methanol (b). Data are presented as mean  $\pm$  SD (n=6  
94 biologically independent samples with three technical repeats). Source data are  
95 provided as a Source Data file.

96

97 **Supplementary Fig. 9**

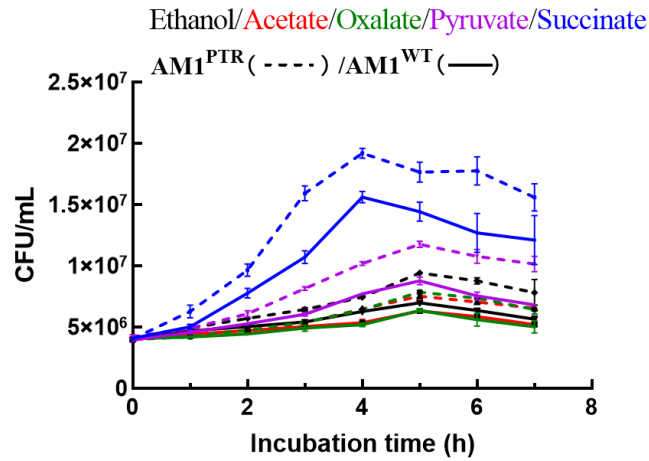

98

99 **Supplementary Fig. 9** The growth curves of the AM1<sup>WT</sup> and the AM1<sup>PTR</sup> strains  
100 grown on multi-carbon sources including ethanol, acetate, oxalate, pyruvate, and  
101 succinate at 0.1 mM. Data are presented as mean ± SD (n=6 biologically independent  
102 samples with three technical repeats). Source data are provided as a Source Data file.

103

104

105

106 **Supplementary Fig. 10**

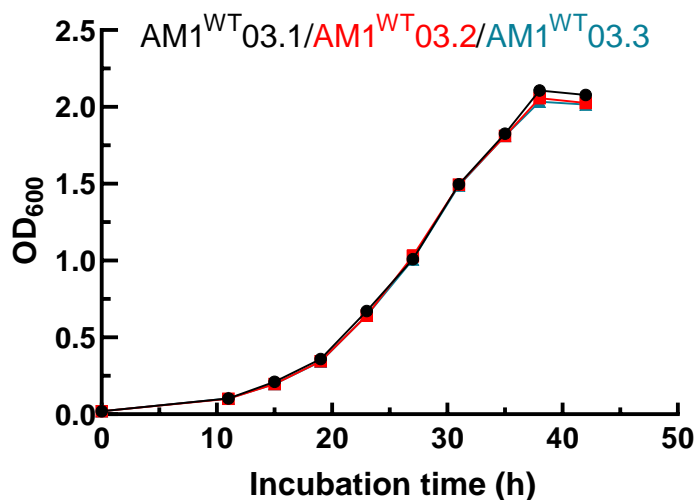

107

108 **Supplementary Fig. 10** Down-regulation of *xfp2* by CRISPRi does not influence the  
109 growth trend of the AM1<sup>WT</sup> on methanol at 120 mM. AM1<sup>WT</sup>03.1: the control strain  
110 carrying the plasmid pAIO-NT0 (the CRISPRi plasmid without small guide RNA);  
111 AM1<sup>WT</sup>03.2 and AM1<sup>WT</sup>03.3: the interfered strains carrying the CRISPRi plasmids  
112 for targeting different region of *xfp2*. Data are presented as mean  $\pm$  SD (n=6  
113 biologically independent samples with three technical repeats). Source data are  
114 provided as a Source Data file.

115

116 **Supplementary Fig. 11**

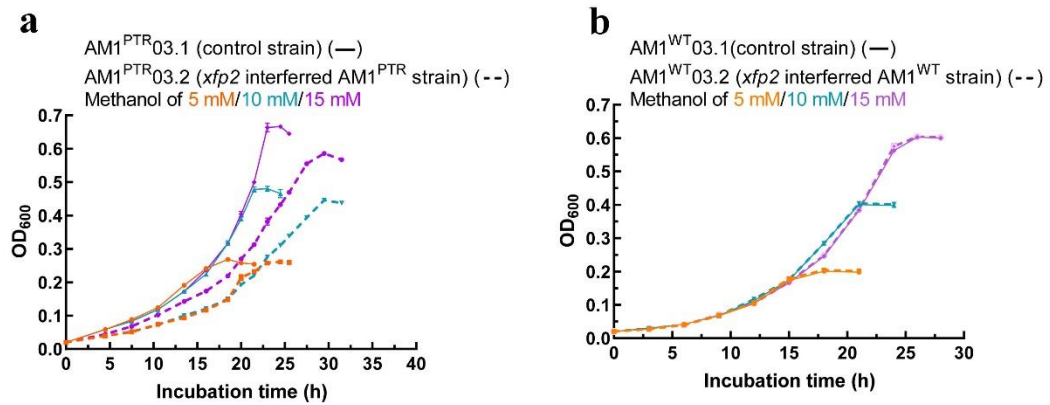

117

118 **Supplementary Fig. 11** Transcriptional down-regulation of the *xfp2* gene by  
119 CRISPRi decreases the growth advantage of the AM1<sup>PTR</sup> strain at low methanol  
120 concentrations of 5 mM, 10 mM, and 15 mM (a), while it does not affect the growth  
121 of the AM1<sup>WT</sup> strain (b). Data are presented as mean  $\pm$  SD (n=6 biologically  
122 independent samples with three technical repeats). Source data are provided as a  
123 Source Data file.

124

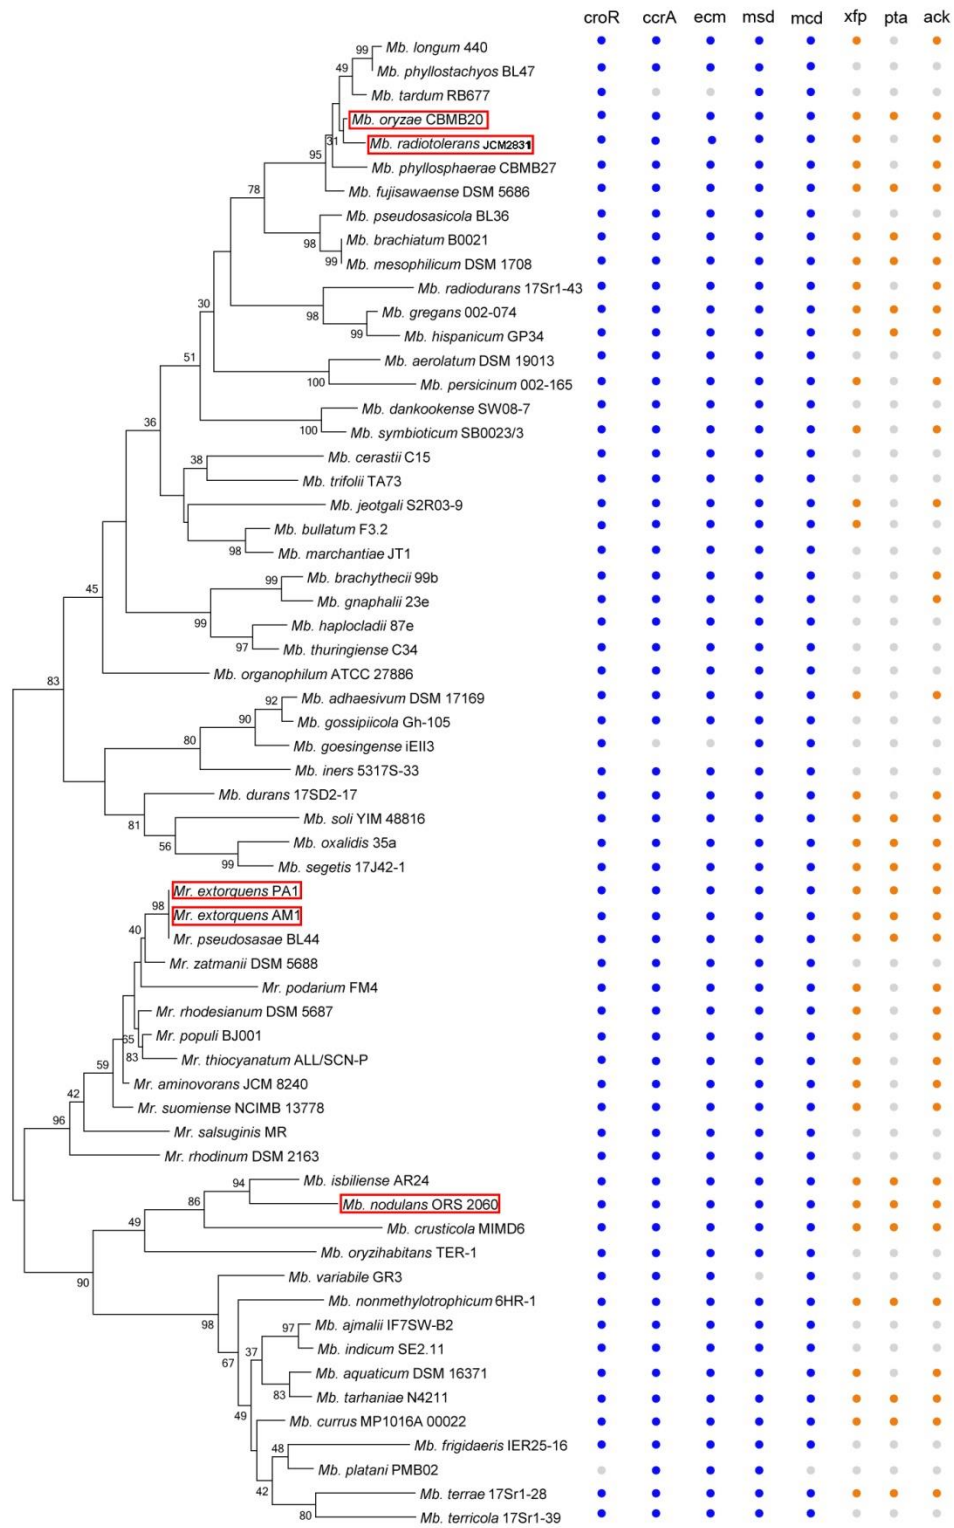

128 **Supplementary Fig. 12** Phylogenetic tree and genome analysis of the members of  
129 *Methylobacterium/Methylorubrum*. The phylogenetic tree was constructed based on  
130 16S rRNA sequences using the neighbor-joining method with MEGA X. The genomes  
131 were analyzed for marker genes of the EMC pathway (*croR*, *ccr*, *ecm*, and *mcd*) and  
132 the PKT pathway (*xfp*, *pta*, and *ack*). Strains with genes of *xfp* and *pta* or *ack* were  
133 considered to have the PKT pathway. The presence of genes in the EMC pathway  
134 were shown in blue dots, and presence of genes in the PKT pathway were shown in  
135 orange dots. The absence of genes was shown in grey dots. In this study, strains with a  
136 *prs* mutation that possessed growth advantages were marked in red.  
137

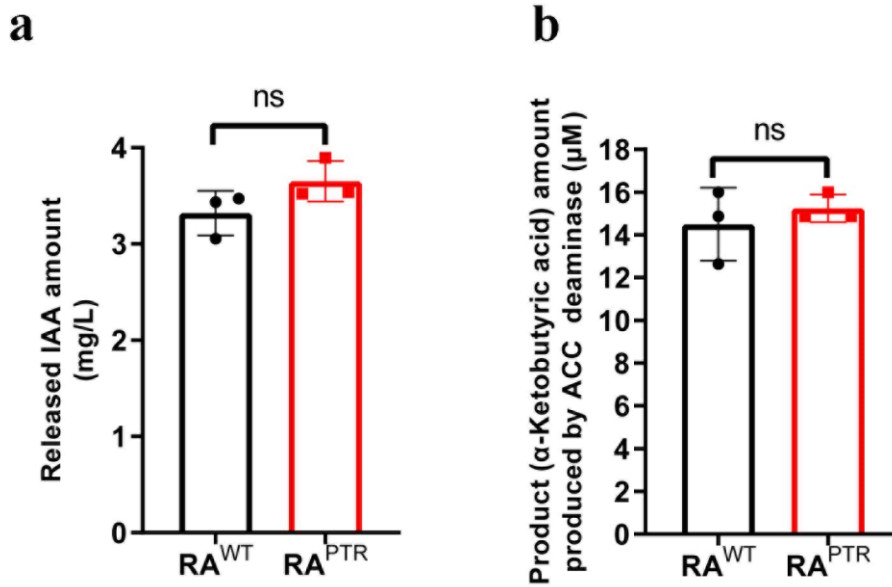

139

140 **Supplementary Fig. 13** The RA<sup>PTR</sup> strain produces similar amounts of IAA and ACC  
141 deaminase with the RA<sup>WT</sup> strains. (a) IAA produced by the RA<sup>WT</sup> and RA<sup>PTR</sup> strains at  
142 OD<sub>600</sub> of 1.0. (b) The amount of product produced by the RA<sup>WT</sup> and RA<sup>PTR</sup> strains at  
143 OD<sub>600</sub> of 1.0 reflected the activity of the ACC deaminase. Data are presented as mean  
144 ± SD (n=3 biologically independent samples with three technical repeats).  
145 Significance was analyzed using a two-tailed t-test analysis. ns means no significance.  
146

147 **Supplementary Fig. 14**

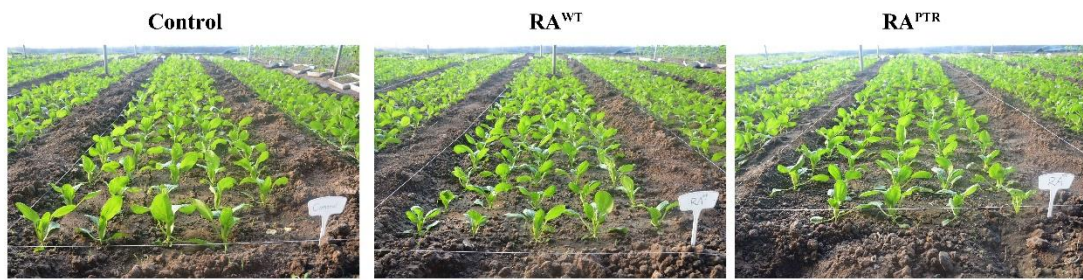

148

149 **Supplementary Fig. 14** *Brassica chinensis* (commonly known as Pak Choi) is

150 cultivated in agricultural solar greenhouse sprayed with the RA strains.



151 **Supplementary Table 1** Strains studied in this work

| Strains                                          | Description                                                                                         | Sources      |
|--------------------------------------------------|-----------------------------------------------------------------------------------------------------|--------------|
| AM1 <sup>WT</sup>                                | <i>Methylorubrum extorquens</i> AM1 wild-type, pink color, rifamycin-resistant strain,              | Reference 74 |
| PA1 <sup>WT</sup>                                | WT <i>Mr. extorquens</i> PA1                                                                        | Reference 38 |
| RA <sup>WT</sup>                                 | WT <i>Methylobacterium radiotolerans</i> JCM2831                                                    | Reference 39 |
| OR <sup>WT</sup>                                 | WT <i>Mb. oryzae</i> CBM20                                                                          | Reference 40 |
| ND <sup>WT</sup>                                 | WT <i>Mb. nodulans</i> ORS2060                                                                      | Reference 39 |
| RS03                                             | <i>Mr. extorquens</i> AM1 $\Delta$ <i>hprA</i> carrying the plasmid pHPL-BM                         | Reference 29 |
| RSE01 to 08                                      | Evolutionary strains from RS03                                                                      | This study   |
| SE01 to SE08                                     | RSE01 to RSE 08 cured plasmid pHPL-BM                                                               | This study   |
| SE01.1                                           | SE01 carrying plasmid pHPR (pCM80 with <i>hprA</i> )                                                | This study   |
| SE02.1                                           | SE02 carrying plasmid pHPR (pCM80 with <i>hprA</i> )                                                | This study   |
| SE07.1                                           | SE07 carrying plasmid pHPR (pCM80 with <i>hprA</i> )                                                | This study   |
| SE01.3                                           | SE01.1 with <i>prs</i> <sup>EVO</sup> back mutated to <i>prs</i> <sup>WT</sup>                      | This study   |
| AM1 <sup>WT</sup> 01                             | AM1 <sup>WT</sup> carrying plasmid pCM80                                                            | This study   |
| AM1 <sup>WT</sup> 01.1                           | AM1 <sup>WT</sup> $\Delta$ <i>hprA</i> carrying plasmid pHPR                                        | This study   |
| AM1 <sup>PTR</sup>                               | AM1 <sup>WT</sup> with <i>prs</i> <sup>WT</sup> mutated to <i>prs</i> <sup>EVO</sup>                | This study   |
| AM1 <sup>WT</sup> 02.1 to AM1 <sup>WT</sup> 02.4 | AM1 <sup>WT</sup> carrying the plasmids pAIO- <i>prs</i> -(NT0, NT275, NT398, NT190)                | This study   |
| AM1 <sup>WT</sup> 03.1 to AM1 <sup>WT</sup> 03.3 | AM1 <sup>WT</sup> carrying the plasmids pAIO- <i>xfp</i> -(NT0, NT2034, NT1973)                     | This study   |
| AM1 <sup>PTR</sup> 03.1, AM1 <sup>PTR</sup> 03.2 | AM1 <sup>PTR</sup> carrying the plasmids pAIO- <i>xfp</i> -(NT0, NT2034)                            | This study   |
| OR01 to OR04                                     | <i>Mb. oryzae</i> CBM20 carrying the plasmids pAIO- <i>prs</i> -(NT0, NT398, NT274, NT190)          | This study   |
| RA01 to RA04                                     | <i>Mb. radiotolerans</i> JCM2831 carrying the plasmids pAIO- <i>prs</i> -(NT0, NT398, NT190, NT274) | This study   |
| PA1 <sup>PTR</sup>                               | <i>Mr. extorquens</i> PA1 with <i>prs</i> <sup>WT</sup> mutated to <i>prs</i> <sup>EVO</sup>        | This study   |
| OR <sup>PTR</sup>                                | <i>Mb. oryzae</i> CBM20 with <i>prs</i> <sup>WT</sup> mutated to <i>prs</i> <sup>EVO</sup>          | This study   |
| RA <sup>PTR</sup>                                | <i>Mb. radiotolerans</i> JCM2831 with <i>prs</i> <sup>WT</sup> mutated to <i>prs</i> <sup>EVO</sup> | This study   |
| ND <sup>PTR</sup>                                | <i>Mb. nodulans</i> ORS2060 with <i>prs</i> <sup>WT</sup> mutated to <i>prs</i> <sup>EVO</sup>      | This study   |
| AM1 <sup>WT</sup> 04                             | WT <i>Mr. extorquens</i> AM1 $\Delta$ <i>xfp</i>                                                    | This study   |
| AM1 <sup>PTR</sup> 04                            | AM1 <sup>PTR</sup> $\Delta$ <i>xfp</i>                                                              | This study   |
| YAIP                                             | WT <i>Mr. extorquens</i> AM1 $\Delta$ <i>crtI</i>                                                   | Reference 33 |

152

153

154 **Supplementary Table 2** Specific mutations in the genomes of the RSE01, RSE02 and  
 155 RSE07 strains

| Genes                                                     | Description                                                                      | RSE01              | RSE02                        | RSE07                          |
|-----------------------------------------------------------|----------------------------------------------------------------------------------|--------------------|------------------------------|--------------------------------|
| <b>SNP</b>                                                |                                                                                  |                    |                              |                                |
| META1_2146                                                | hypothetical protein                                                             | /                  | /                            | Q250R<br>(A749G)               |
| META1_2592                                                | DEAD/DEAH box helicase domain protein                                            | P195R<br>(G584C)   | /                            | /                              |
| Intergenic region between<br>META1_3141 and<br>META1_3142 | META1_3141: Ketopantoate reductase ApbA/PanE<br>META1_3142: hypothetical protein |                    | C3280661A                    |                                |
| META1_3302                                                | LL-diaminopimelate aminotransferase                                              | /                  | /                            | R295C<br>(C883T)               |
| META1_4249                                                | ribose-phosphate pyrophosphokinase                                               | D38N<br>(G112A)    | /                            | /                              |
| <b>Insertion/Deletion</b>                                 |                                                                                  |                    |                              |                                |
| META1_0458                                                | hypothetical protein                                                             |                    | I1bp<br>C482893              |                                |
| META1_0557                                                | methyl-accepting chemotaxis receptor/sensory<br>transducer                       |                    | I1bp<br>C580985              |                                |
| META1_0574                                                | conserved hypothetical protein with putative<br>ATP-dependent helicase domain    |                    | I1bp<br>T601196              |                                |
| META1_0740                                                | DUF3572 domain-containing protein                                                |                    | $\Delta$ 1bp<br>G770863      |                                |
| META1_2262                                                | patatin-like phospholipase                                                       |                    | $\Delta$ 1bp<br>C350         |                                |
| META1_2592                                                | DEAD/DEAH box helicase domain protein                                            | I2bp, $\Delta$ 3bp | /                            | /                              |
| META1_2909                                                | maltose alpha-D-glucosyltransferase                                              |                    | $\Delta$ 1bp                 |                                |
| META1_3022                                                | DEAD/DEAH box helicase                                                           |                    | $\Delta$ 1bp                 |                                |
| META1_3892                                                | glutathione transferase                                                          |                    | $\Delta$ 5bp                 |                                |
| META1_3908                                                | leucyl aminopeptidase                                                            | /                  | I12bp                        | /                              |
| META1_3990                                                | hypothetical protein                                                             | /                  | /                            | I2bp,<br>I2bp,<br>$\Delta$ 2bp |
| META1_3992                                                | hypothetical protein                                                             | /                  | /                            | I1bp, $\Delta$ 3bp             |
| META1_4005                                                | hypothetical protein                                                             | /                  | $\Delta$ 1bp<br>$\Delta$ 3bp | /                              |
| Intergenic region between<br>META1_4007 and<br>META1_4009 | META1_4007: hypothetical protein<br>META1_4009: hypothetical protein             | /                  | $\Delta$ 1bp                 | /                              |
| META1_4009                                                | hypothetical protein                                                             | /                  | I2bp<br>$\Delta$ 2bp         | /                              |
| Intergenic region between<br>META1_4710 and<br>META1_4711 | META1_4710: hypothetical protein<br>META1_4711: hypothetical protein             | /                  | $\Delta$ 1bp                 | /                              |
| PlasmidpCM80-PmxAF                                        | Promoter and RBS                                                                 | $\Delta$ 366bp     | /                            | /                              |

156

157

**Supplementary Table 5** Plasmids used in this study

| <b>Plasmids</b> | <b>Description</b>                                                                                                                                                               | <b>Sources</b> |
|-----------------|----------------------------------------------------------------------------------------------------------------------------------------------------------------------------------|----------------|
| pCM80           | vector used for gene expression in <i>Mr. extorquens</i> ; promoter, PmxAF; antibiotics, TetR, KmR                                                                               | Reference 65   |
| pCM433          | <i>sacB</i> -based allelic exchange vector; antibiotics, ApR, CmR, TetR                                                                                                          | Reference 64   |
| pHPL-BM         | pCM80 derivative contained <i>hpsBM</i> and <i>phiBM</i> connected with linker under the control of constitutive promoter PmxAF                                                  | Reference 29   |
| pHPR            | pCM80 derivative contained <i>Mr. extorquens</i> AM1 <i>hprA</i>                                                                                                                 | This study     |
| pPRSW           | <i>Mr. extorquens</i> AM1 <i>prs</i> <sup>WT</sup> in pCM433                                                                                                                     | This study     |
| pPRSE           | <i>Mr. extorquens</i> AM1 <i>prs</i> <sup>EVO</sup> in pCM433                                                                                                                    | This study     |
| pET-PRSW        | pET-32a derivative contained <i>Mr. extorquens</i> AM1 <i>prs</i> <sup>WT</sup>                                                                                                  | This study     |
| pET-PRSE        | pET-32a derivative contained <i>Mr. extorquens</i> AM1 <i>prs</i> <sup>EVO</sup>                                                                                                 | This study     |
| pAIO            | pCM80 derivative with <i>dcas9</i> and <i>sgRNA</i> expression cassette; <i>dcas9</i> and <i>sgRNA</i> under the control of inducible promoter PR/tetO and PmxAF-g, respectively | Reference 33   |
| pKNXFP          | <i>Mr. extorquens</i> AM1 <i>xfp</i> deletion in pCM433                                                                                                                          | This study     |
| pPRSE-PA1       | <i>Mr. extorquens</i> PA1 <i>prs</i> <sup>EVO</sup> in pCM433                                                                                                                    | This study     |
| pPRSE-OR        | <i>Mb. oryzae</i> CBM20 <i>prs</i> <sup>EVO</sup> in pCM433                                                                                                                      | This study     |
| pPRSE-RA        | <i>Mb. radiotolerans</i> JCM2831 <i>prs</i> <sup>EVO</sup> in pCM433                                                                                                             | This study     |
| pPRSE-ND        | <i>Mb. nodulans</i> ORS2060 <i>prs</i> <sup>EVO</sup> in pCM433                                                                                                                  | This study     |

161

**Supplementary Table 7** Soil composition in the solar greenhouse

| <b>Items</b>             | <b>Contents</b>           |
|--------------------------|---------------------------|
| Moisture content         | 13.8%                     |
| pH                       | 7.40                      |
| Hydrolyzable nitrogen    | 369 mg/kg                 |
| Organic matter           | 29.6 g/kg                 |
| Chloride ion             | 0.484 g/kg                |
| Available phosphorus     | 56.3 mg/kg                |
| EC Value                 | 128 mS/m                  |
| Soil infiltration rate   | 0.68 mm/min               |
| Available potassium      | 663 mg/kg                 |
| Available calcium        | 650 mg/kg                 |
| Available copper         | 2.26 mg/kg                |
| Available iron           | 4.74 mg/kg                |
| Available magnesium      | 988 mg/kg                 |
| Available manganese      | 1.52 mg/kg                |
| Available zinc           | 5.86 mg/kg                |
| Cation exchange capacity | 8.2 cmol <sup>+</sup> /kg |
| Available sulfur         | 10.6 mg/kg                |
| Available molybdenum     | 0.12 mg/kg                |

162

163

164

165

166

167

168

169

170

171

172

173

174

175

176

177

178

179 **Reference**

180 1. Chistoserdova, L.V. & Lidstrom, M.E. Purification and characterization of  
181 hydroxypyruvate reductase from the facultative methylotroph *Methylobacterium*  
182 *extorquens* AM1. *J Bacteriol*, **173**, 7228-7232 (1991).

183

184
