# Supplementary material for: Phosphoribosylpyrophosphate synthetase as a metabolic valve advances Methylobacterium/Methylorubrum phyllosphere colonization and plant growth
Source: PubMed Central journal article supplement (PMC11252147; doi:10.1038/s41467-024-50342-9), 2024-07-16
Supplement: 41467_2024_50342_MOESM3_ESM.pdf [file 41467_2024_50342_MOESM3_ESM.pdf]

## **Description of Additional Supplementary Files**

**Supplementary Data 1:** The comparison of metabolite pools between *Mr. extorquens* strains of AM1PTR and AM1WT grown on 10 mM methanol. Each sample had three biological replicates. Significance was analyzed using a two-tailed t-test analysis.

**Supplementary Data 2:** The comparison of transcriptional levels of genes involved in the central methyotrophic pathways between *Mr. extorquens* strains of AM1PTR and AM1WT grown on 10 mM methanol. Each sample had three biological replicates with five technical repeats. Significance was analyzed using a two-tailed t-test analysis.

**Supplementary Data 3:** Primers used in this study.
